# Supplementary material
Source: Elsevier journal article supplement (https://www.sciencedirect.com/science/article/pii/S0213005X21003748)

SUPPLEMENTARY MATERIAL

Figure S-1 Source and etiology of the superinfections

A) VA-LRTI

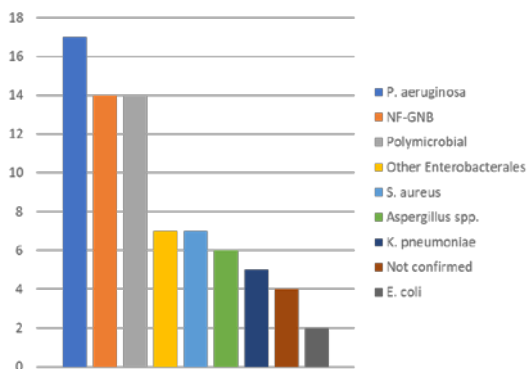

B) PRIMARY BSI

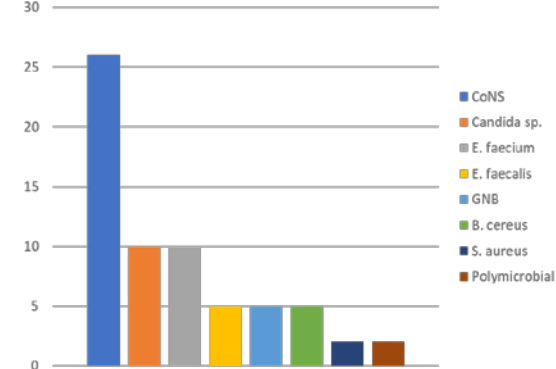

C) SECONDARY BSI

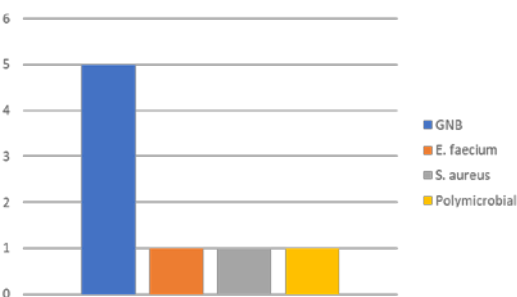

D) URINARY TRACT INFECTION

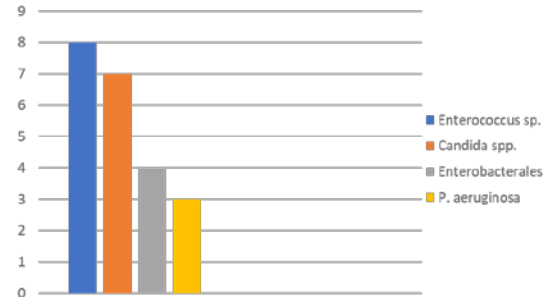

CAMBIOS EFECTUADOS: ref 1.8

Figure S-2 Levels of procalcitonin (PCT) and lactate for each type of infection

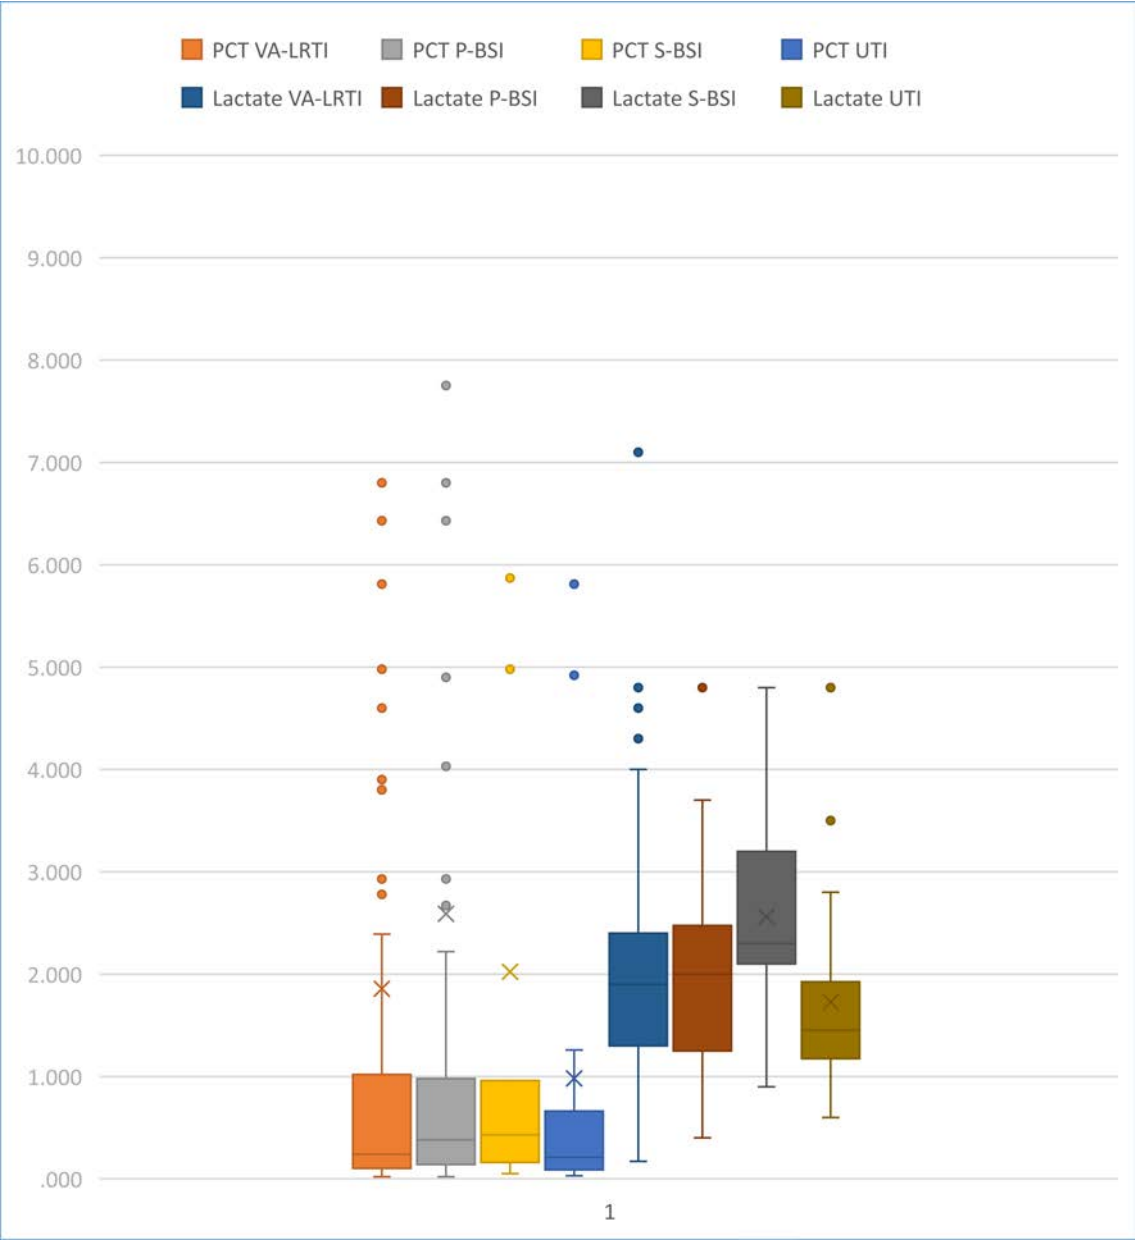

Supplement: mmc1 [file S0213005X21003748:mmc1.pdf]
